# Supplementary material for: Hair Follicle Targeting and Dermal Drug Delivery with Curcumin Drug Nanocrystals—Essential Influence of Excipients
Source: MDPI journal article supplement (doi:10.3390/nano10112323), 2020-11-23
Supplement: s1 [file s1]

# Supplementary Materials: Hair Follicle Targeting and Dermal Drug Delivery with Curcumin Drug Nanocrystals—Essential Influence of Excipients

Olga Pelikh and Cornelia M. Keck \*

S1: Untreated Skin.

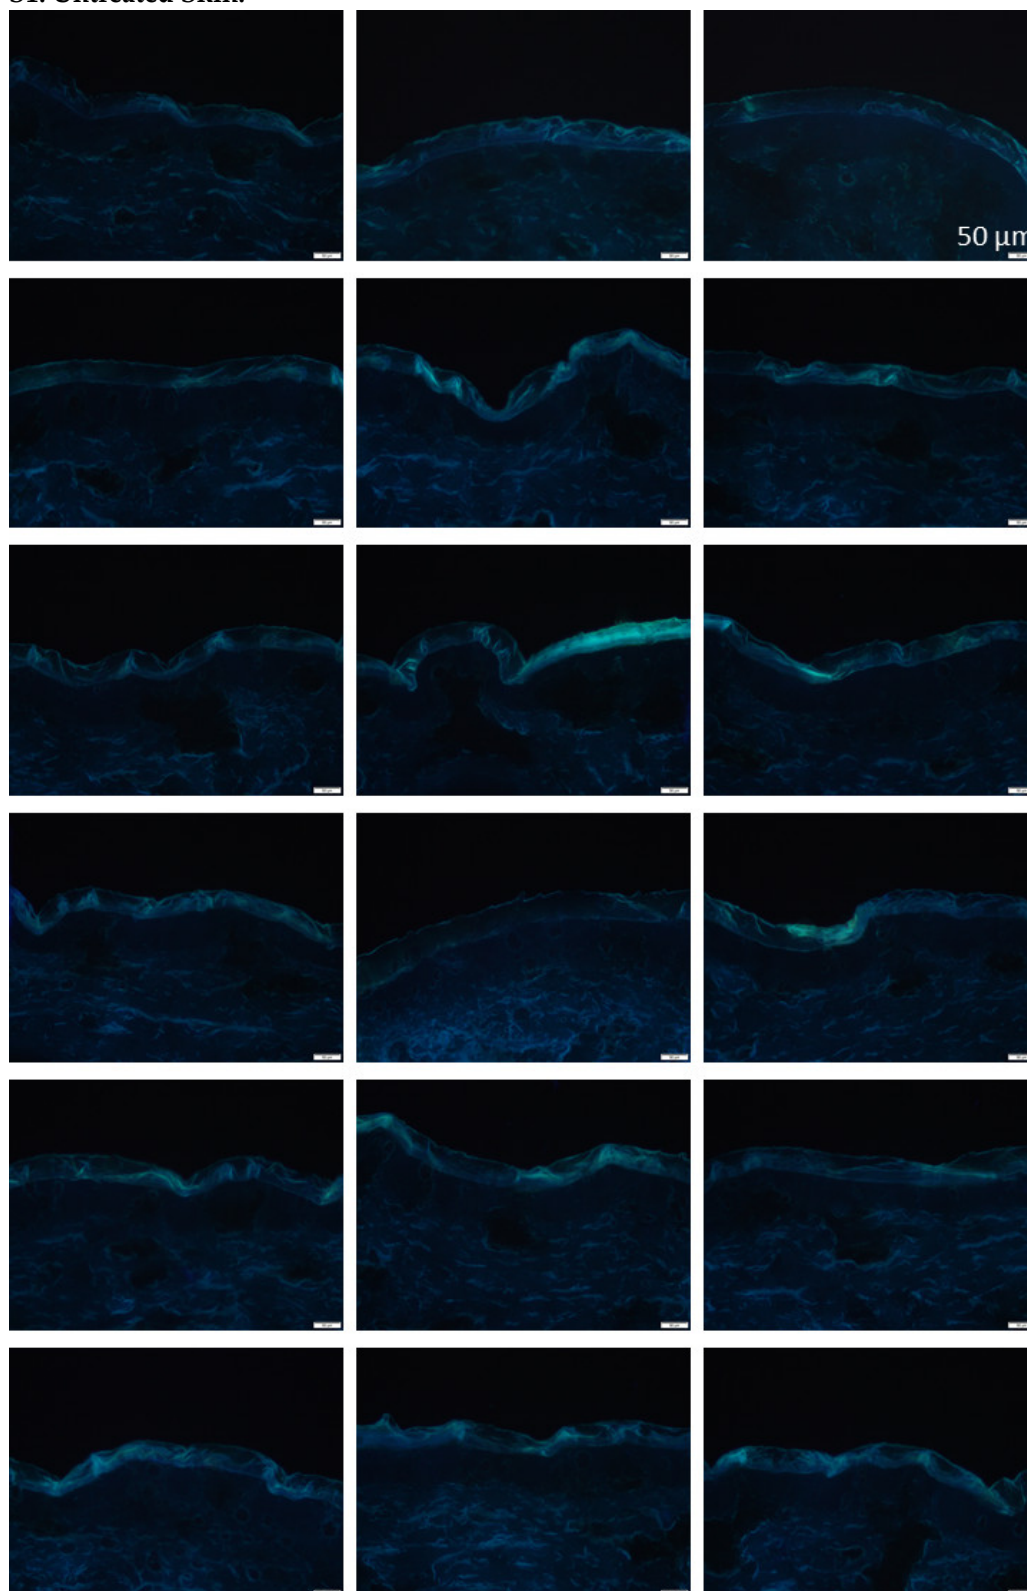

**Figure S1.** Skin sections of untreated skin. Magnification: 200 fold.

**S2: Skin Treated with Nanosuspension without Additives.**

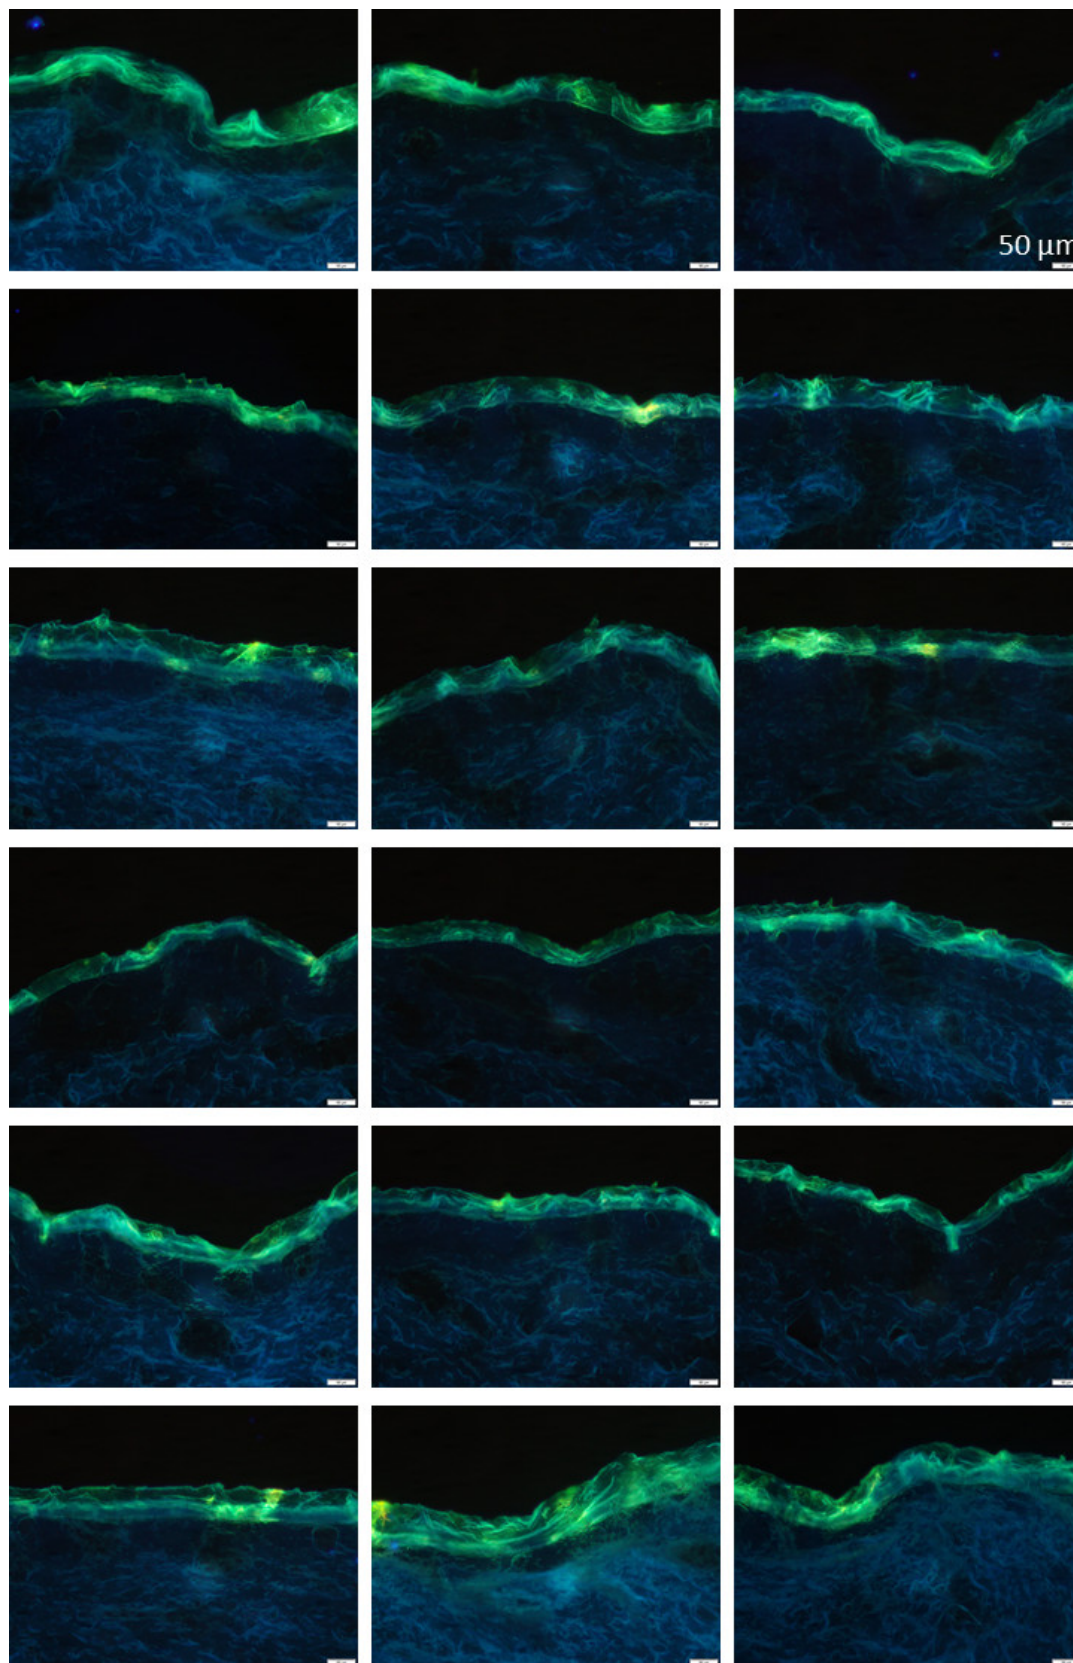

**Figure S2.** Skin sections of skin treated with nanosuspension without additives. Magnification: 200 fold.



**S3: Skin Treated with Nanosuspension with 2% Glycerol.**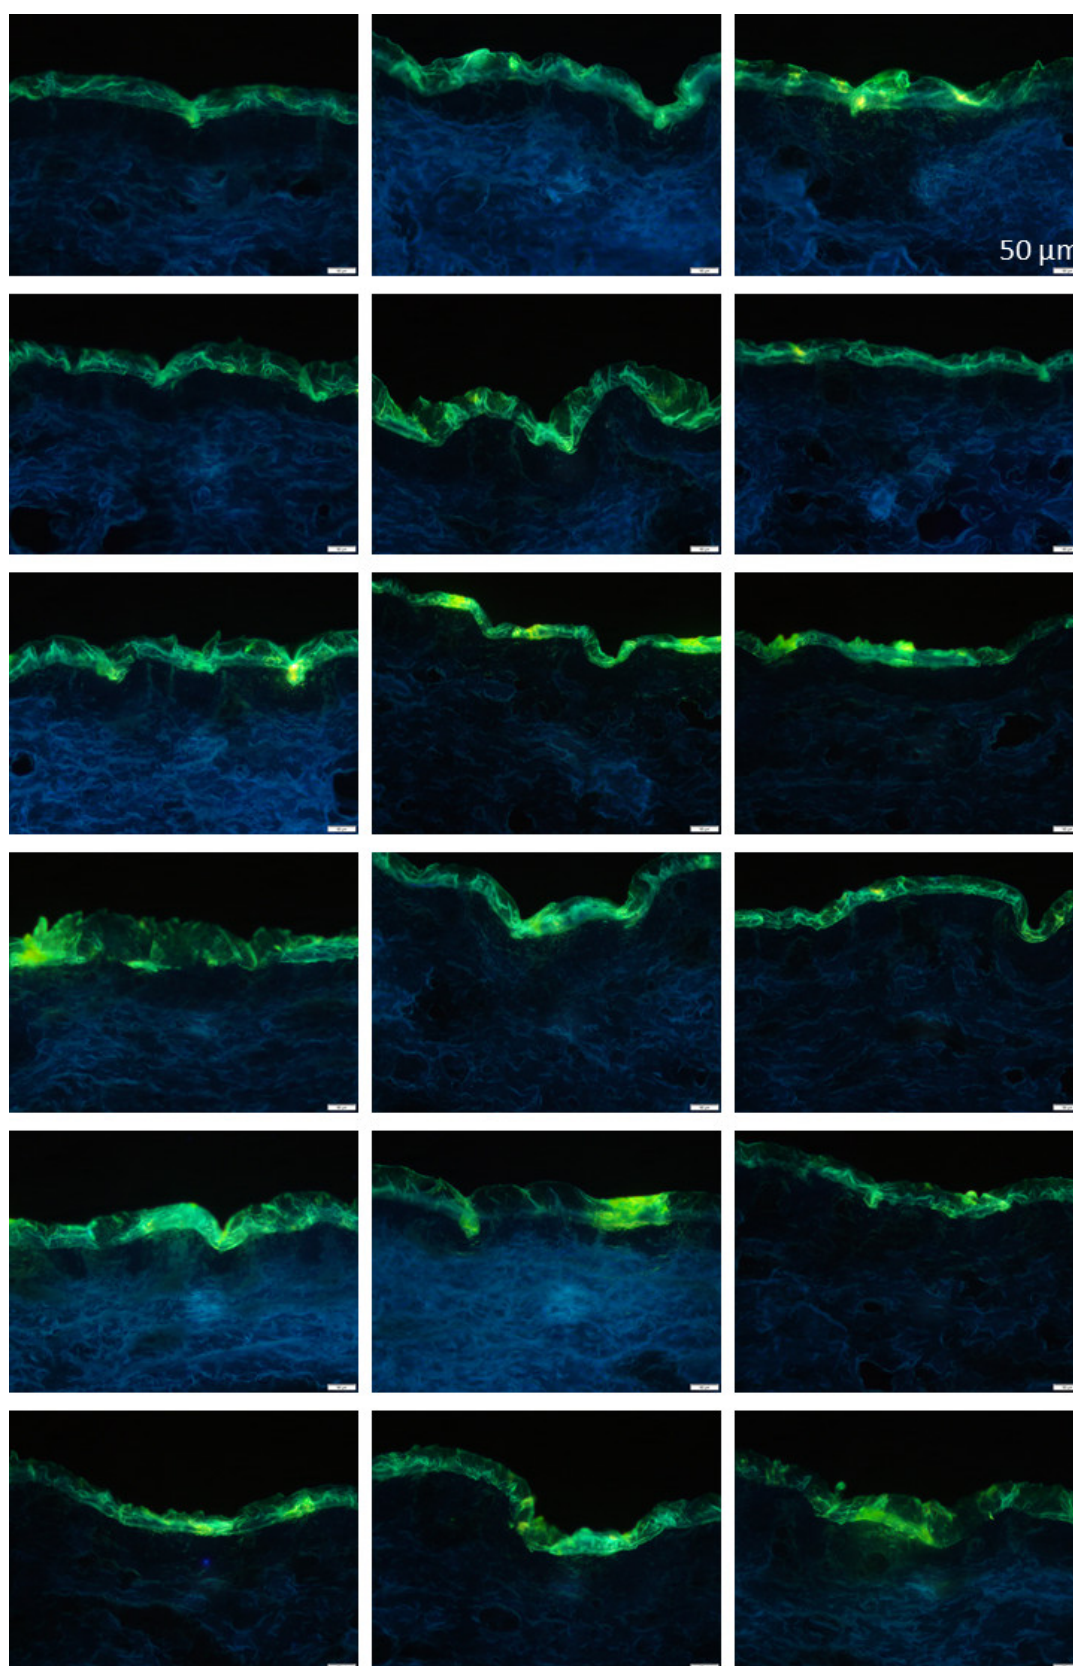

**Figure S3.** Skin sections of skin treated with nanosuspension contained 2% glycerol. Magnification: 200 fold.

**S4: Skin Treated with Nanosuspension with 5% Glycerol.**

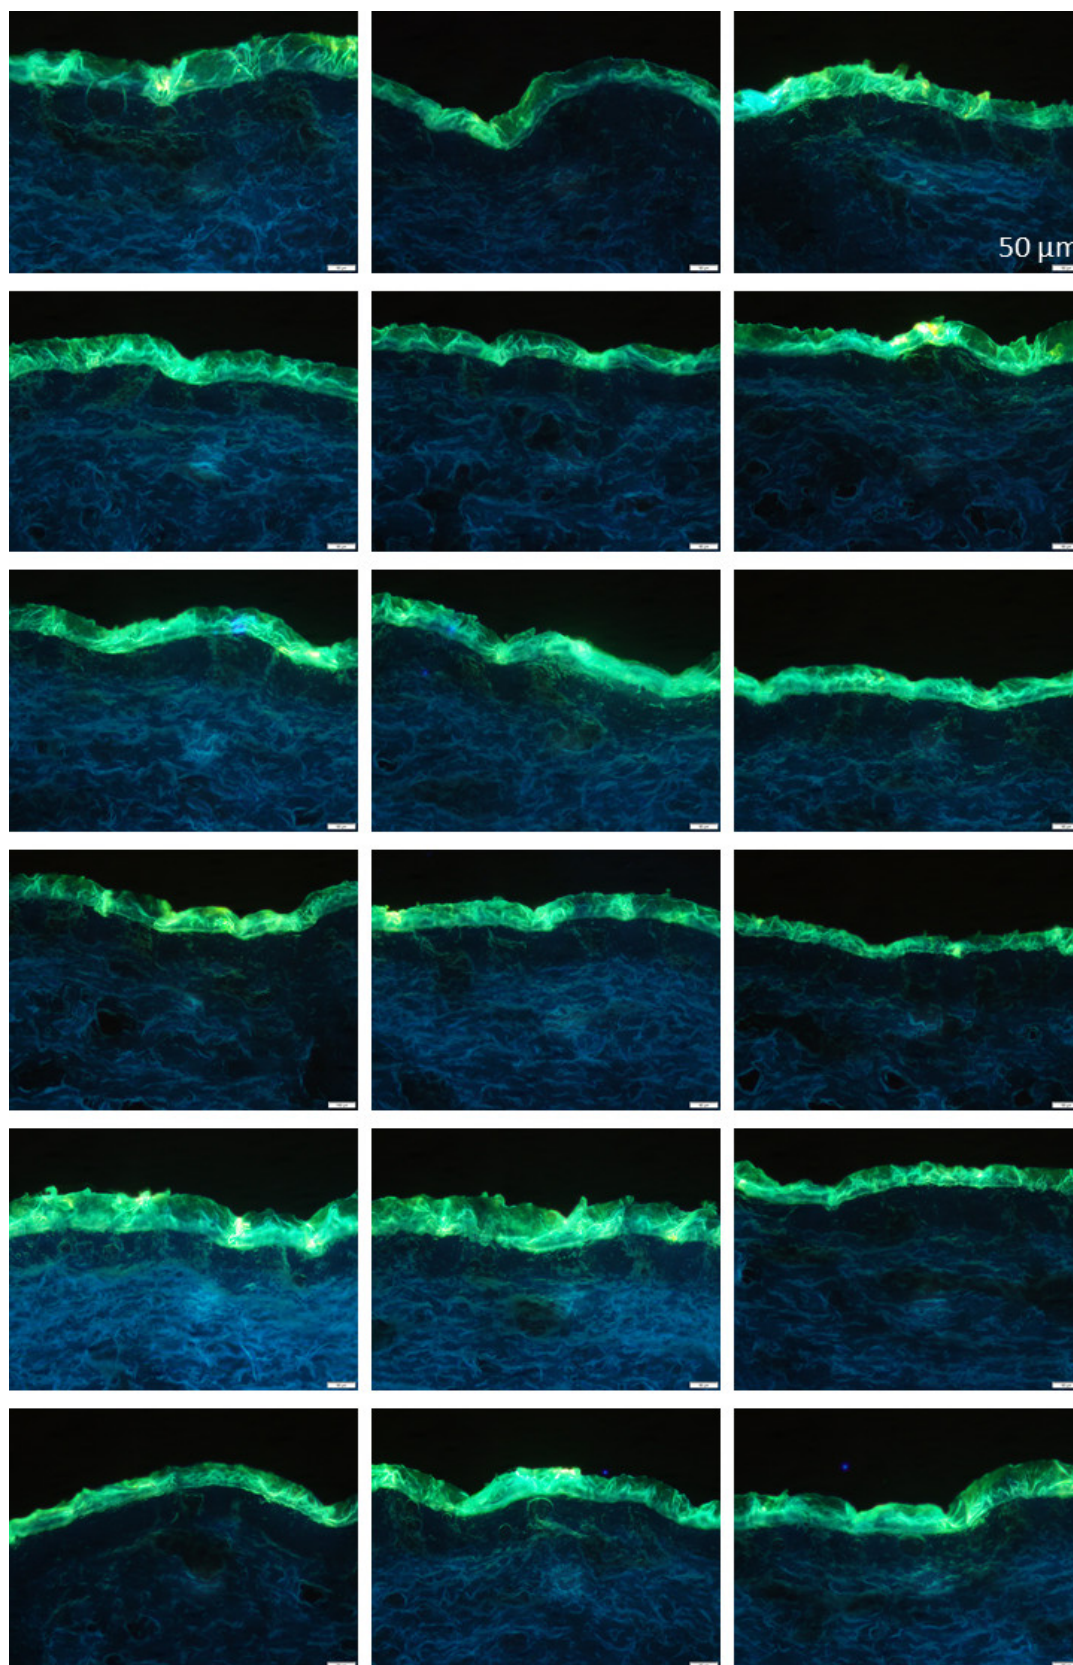

**Figure S4.** Skin sections of skin treated with nanosuspension contained 5% glycerol. Magnification: 200 fold.

**S5: Skin Treated with Nanosuspension with 5% Urea.**



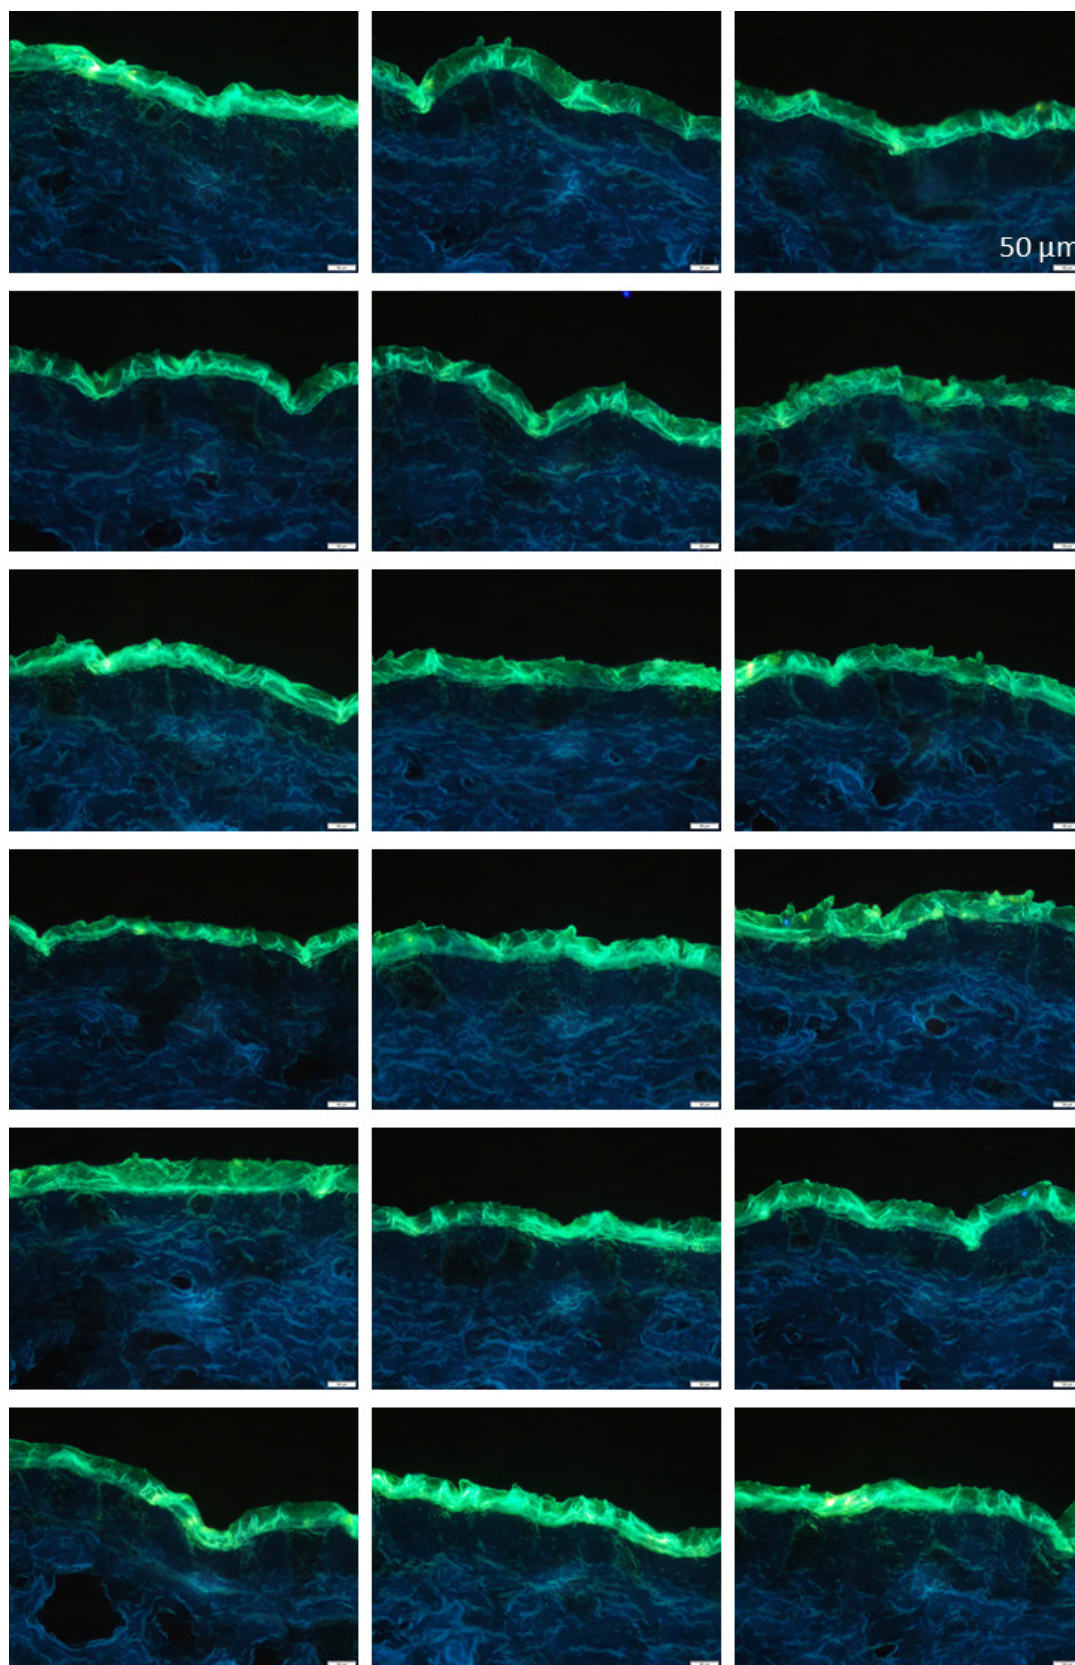

**Figure S5.** Skin sections of skin treated with nanosuspension contained 5% urea. Magnification: 200 fold.

**S6: Skin Treated with Nanosuspension with 10% Urea.**

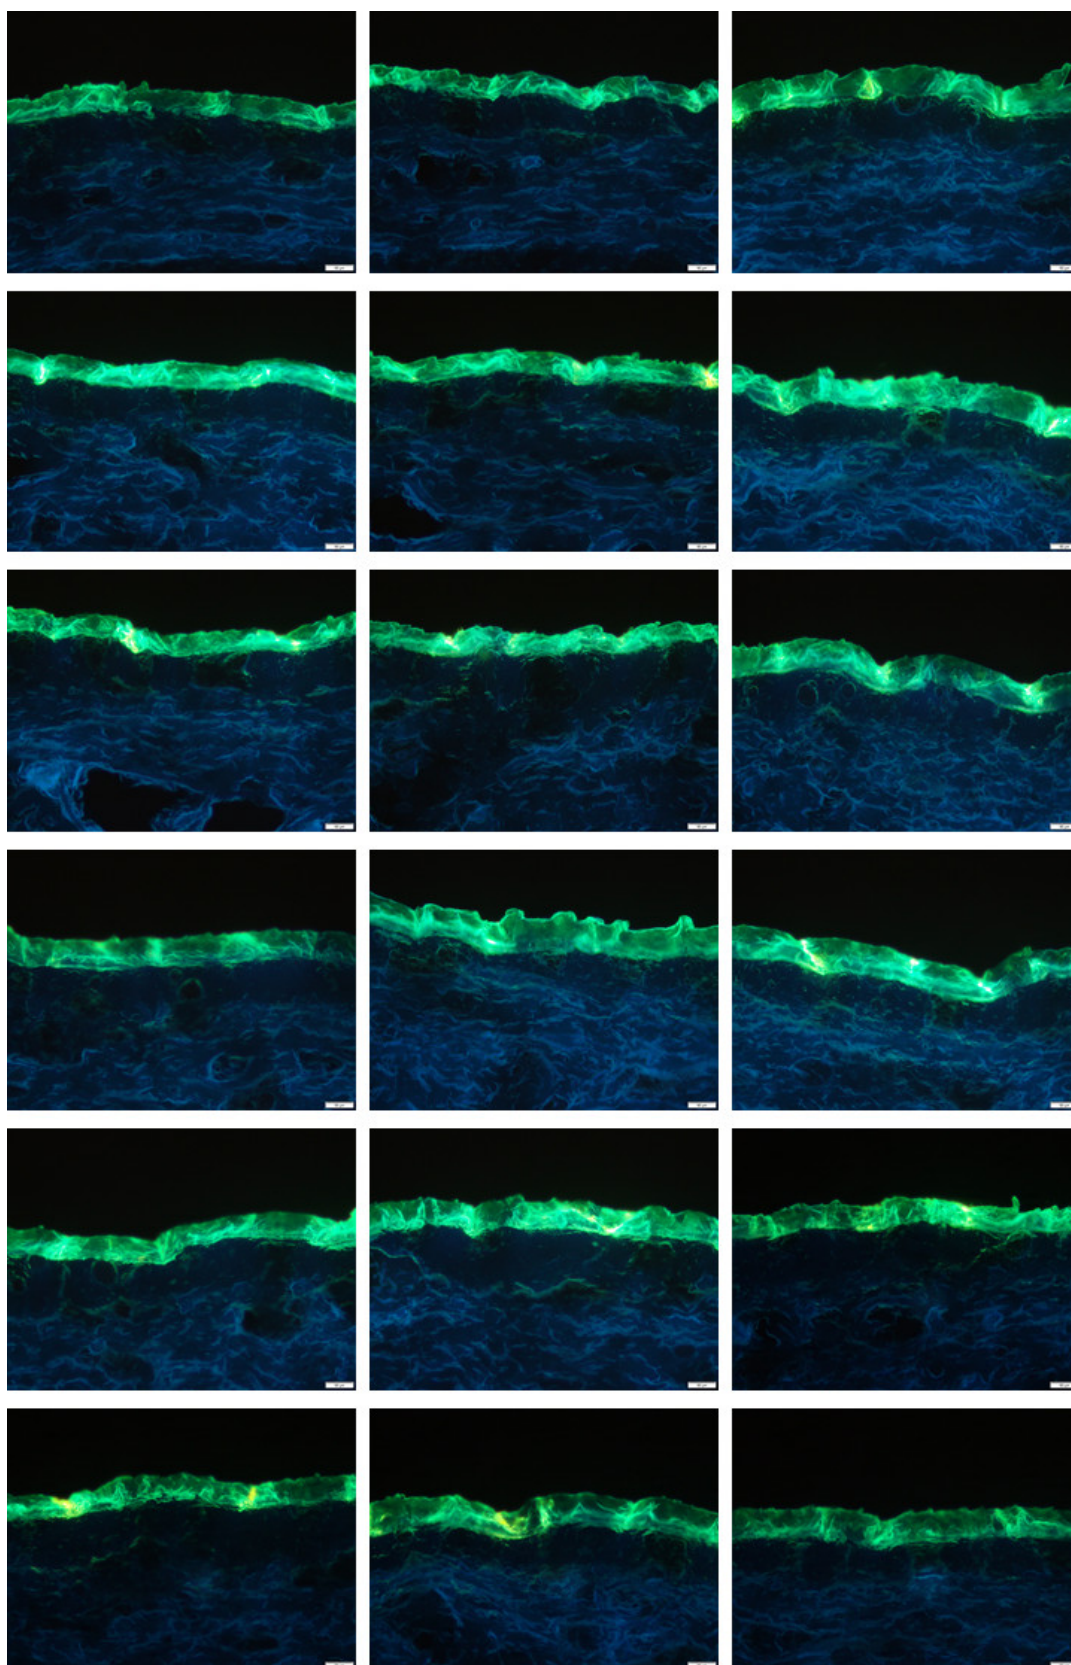

**Figure S6.** Skin sections of skin treated with nanosuspension contained 10% urea. Magnification: 200 fold.

**S7: Skin Treated with Nanosuspension with 5% Propylene Glycol.**



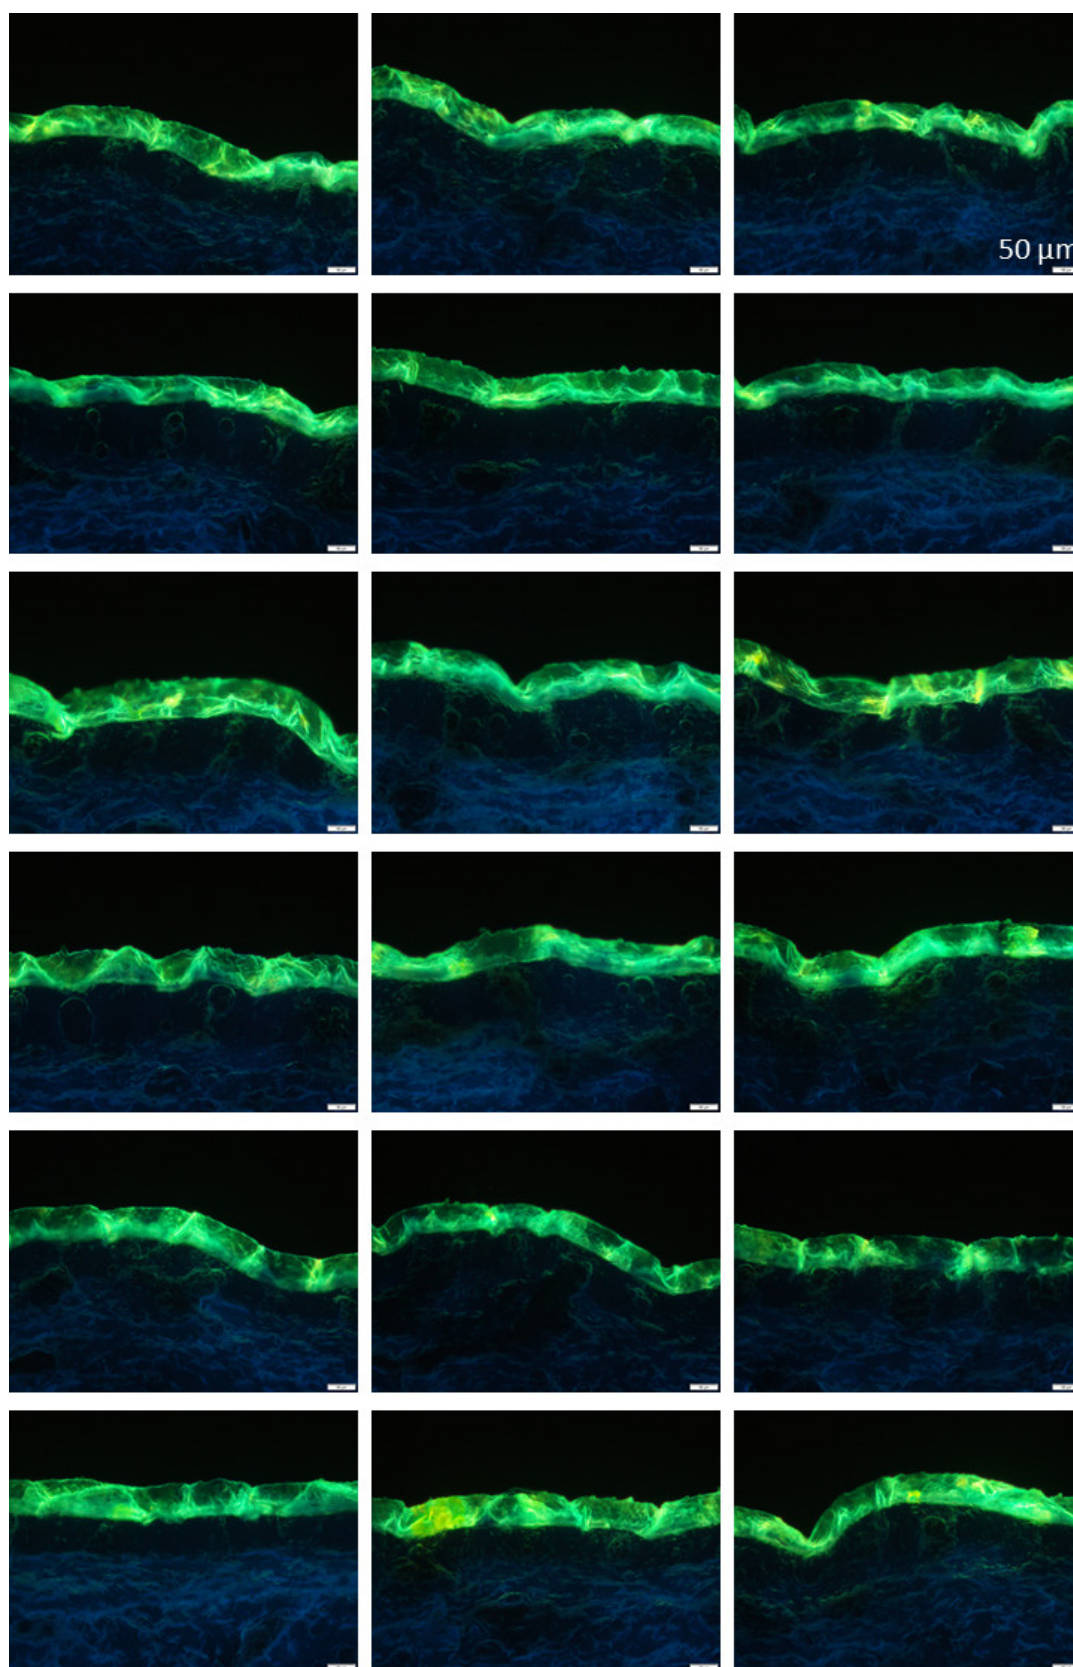

**Figure S7.** Skin sections of skin treated with nanosuspension contained 5% propylene glycol. Magnification: 200 fold.

**S8: Skin Treated with Nanosuspension with 2% Ethanol.**

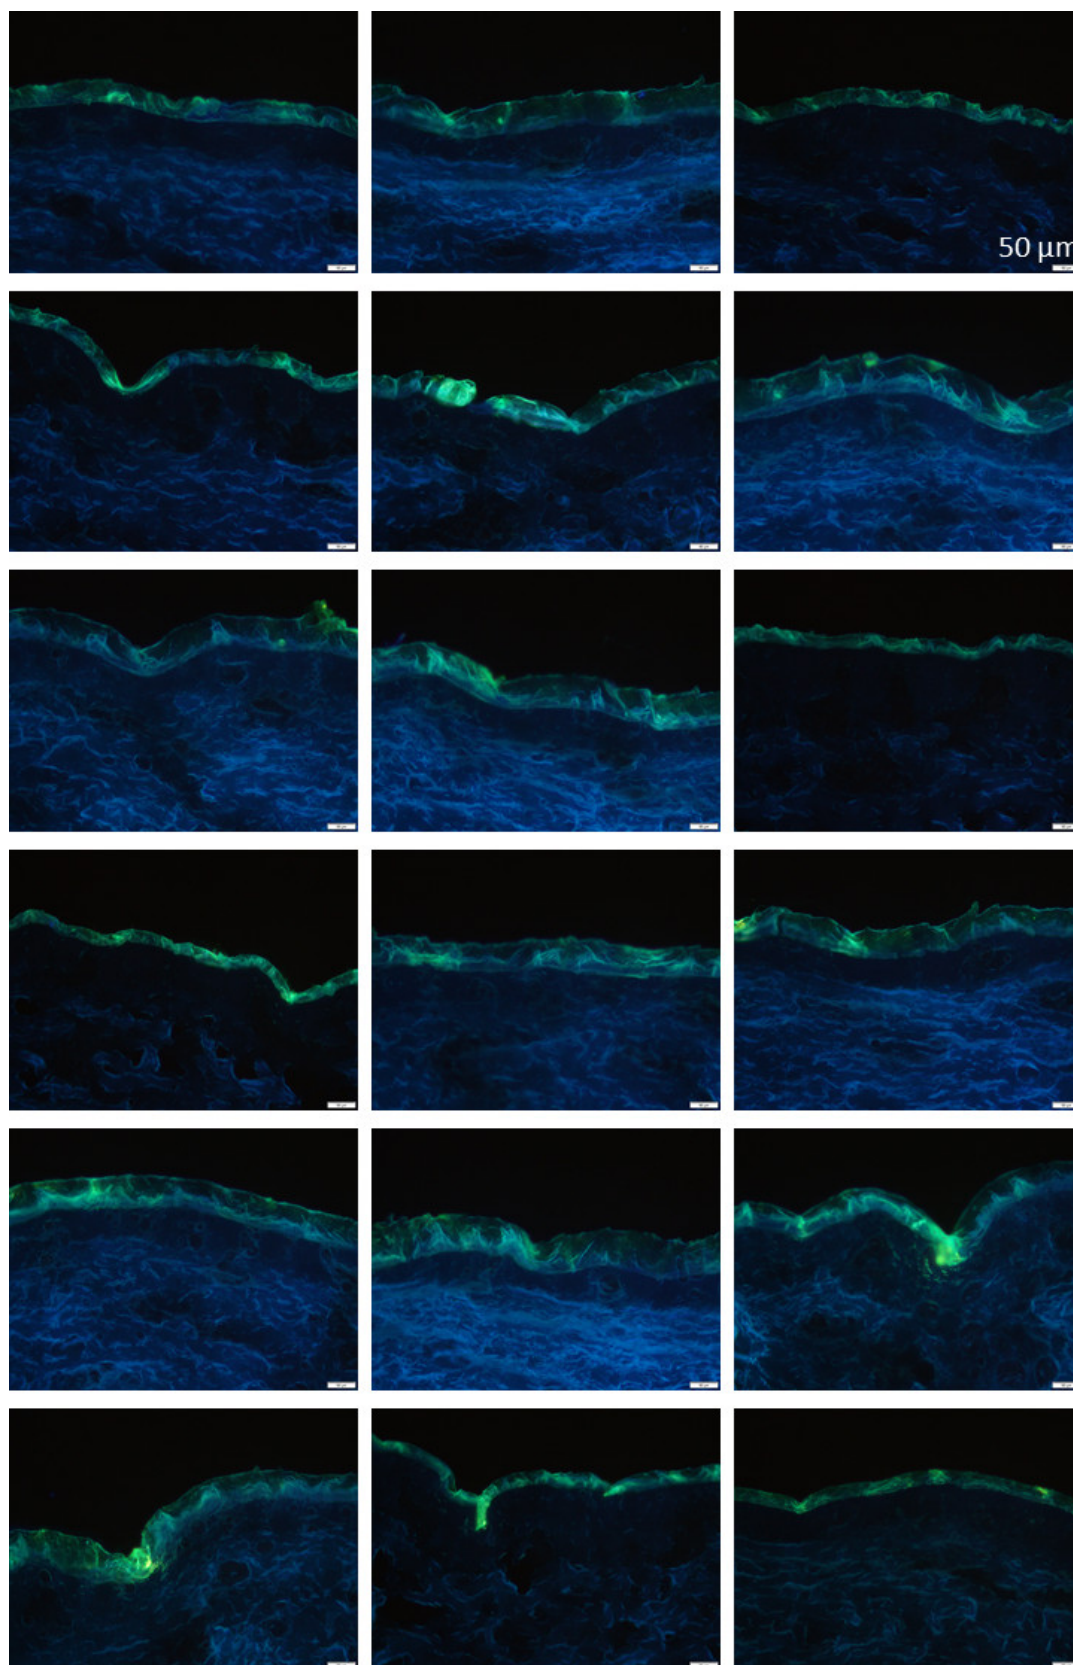

**Figure S8.** Skin sections of skin treated with nanosuspension contained 2% ethanol. Magnification: 200 fold.

**S9: Skin Treated with Nanosuspension with 2% Olive Oil.**



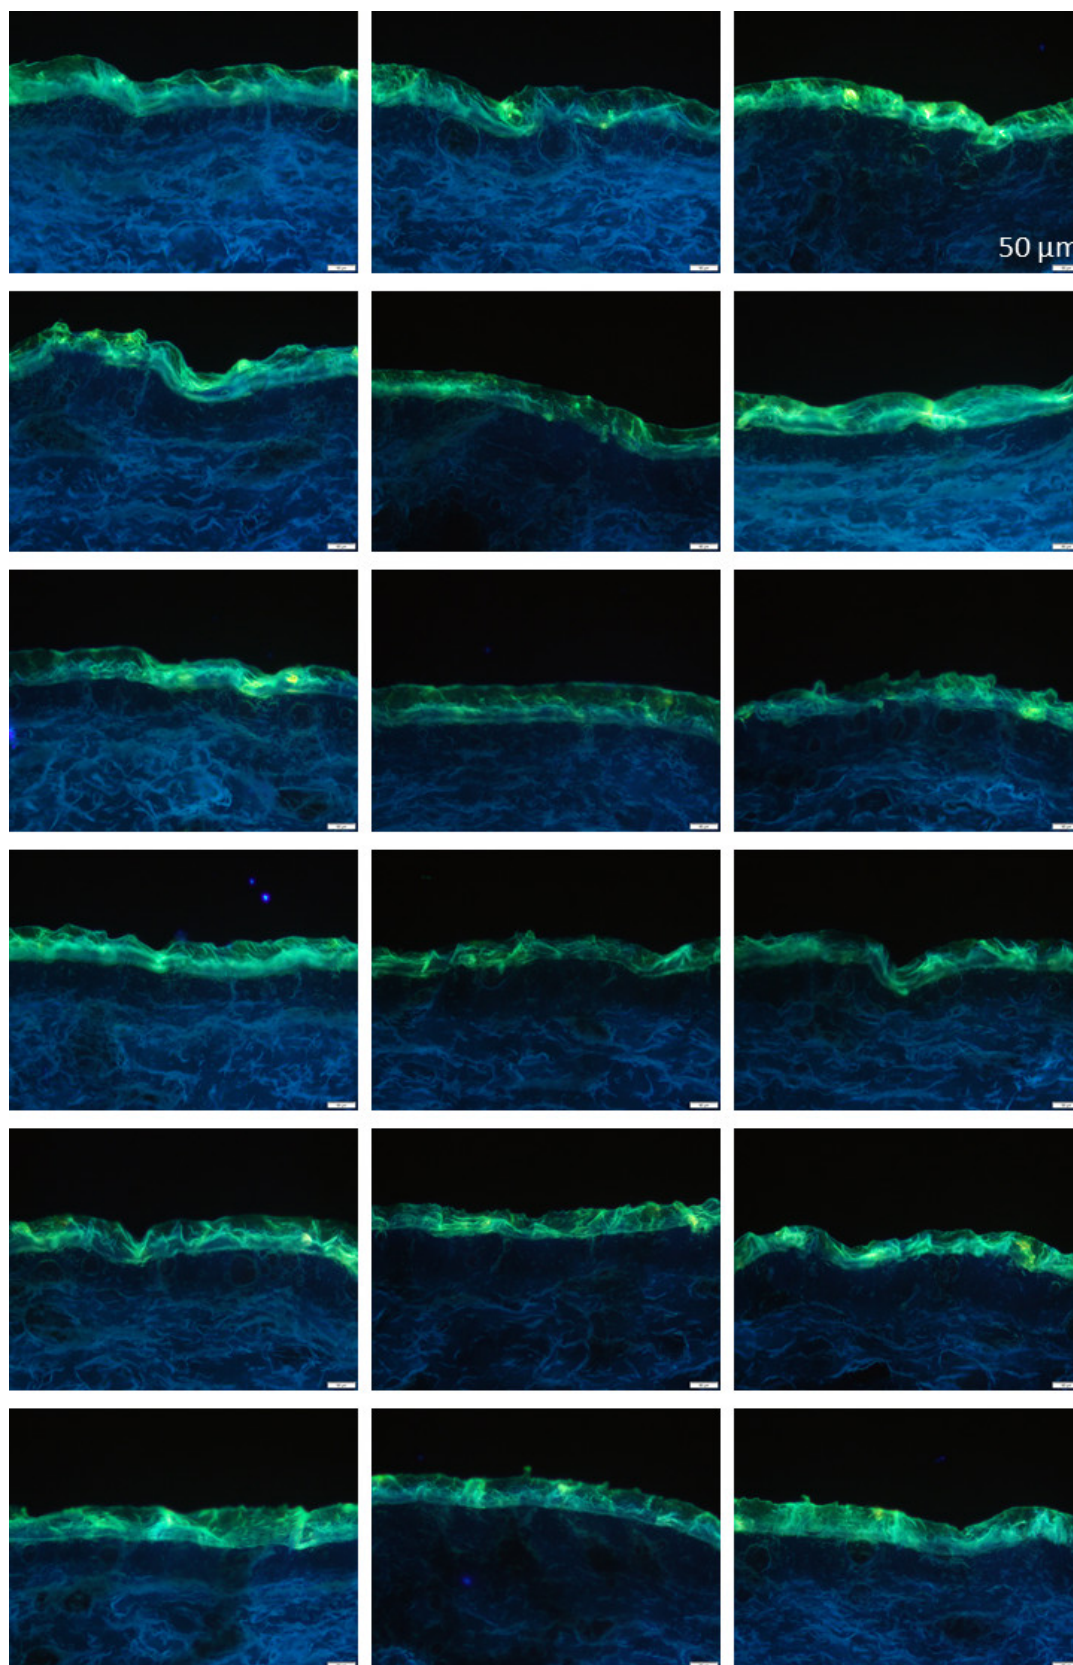

**Figure S9.** Skin sections of skin treated with nanosuspension contained 2% olive oil. Magnification: 200 fold.

**S10: Hair Follicles Treated with Curcumin Nanocrystals without Additives.**

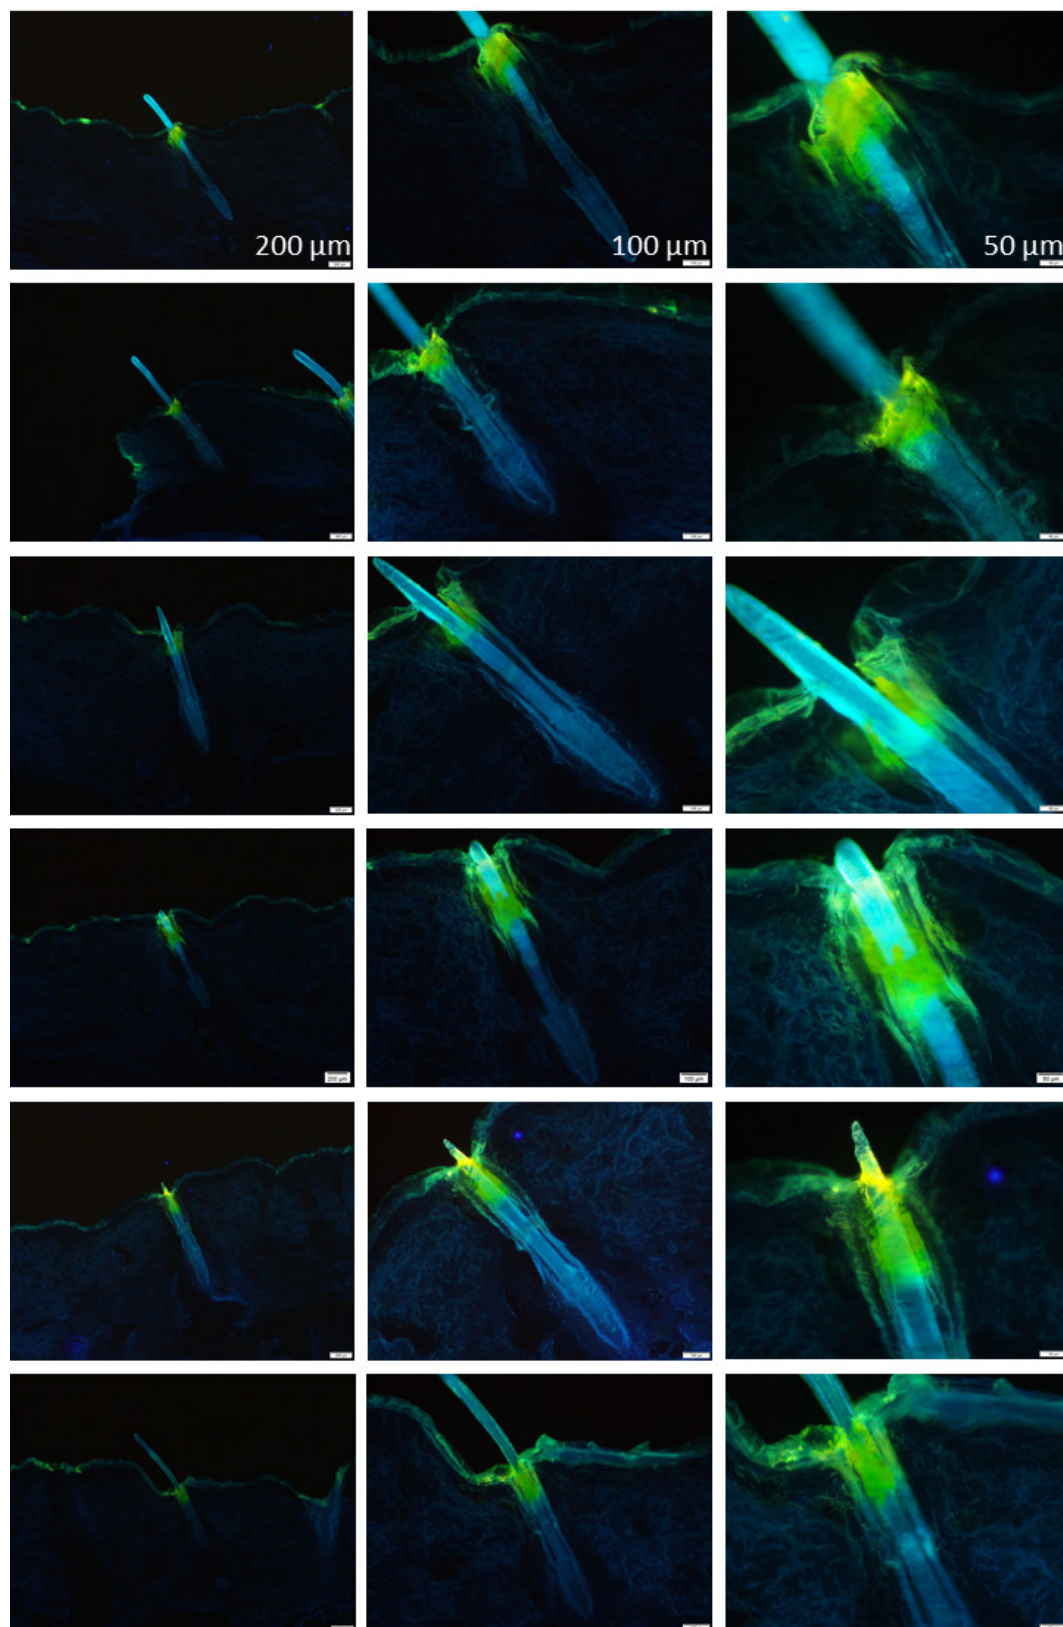

**Figure S10.** Hair follicles treated with nanosuspension without additives. Left column: images taken at 40fold magnification. Middle column: images taken at 100 fold magnification. Right column: images taken at 200 fold magnification.

**S11: Hair Follicles Treated with Curcumin Nanocrystals with 2% Glycerol.**



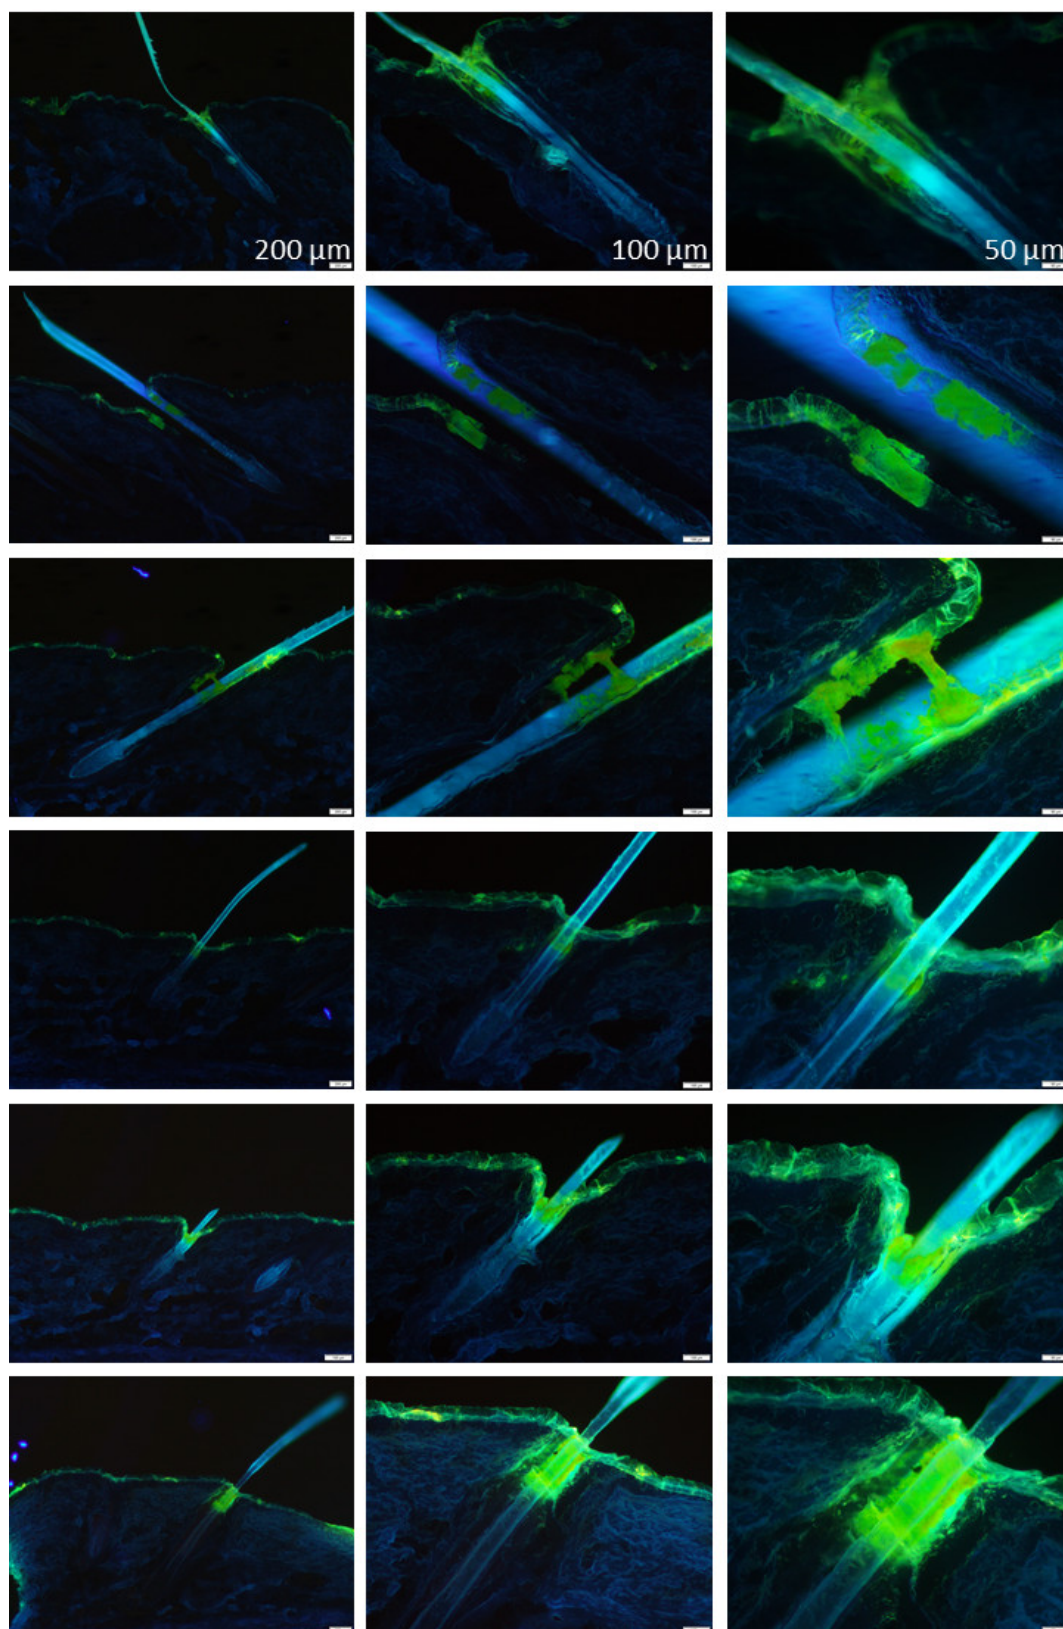

**Figure S11.** Hair follicles treated with nanosuspension with 2% glycerol. Left column: images taken at 40 fold magnification. Middle column: images taken at 100 fold magnification. Right column: images taken at 200 fold magnification.

**S12: Hair Follicles Treated with Curcumin Nanocrystals with 5% Glycerol.**

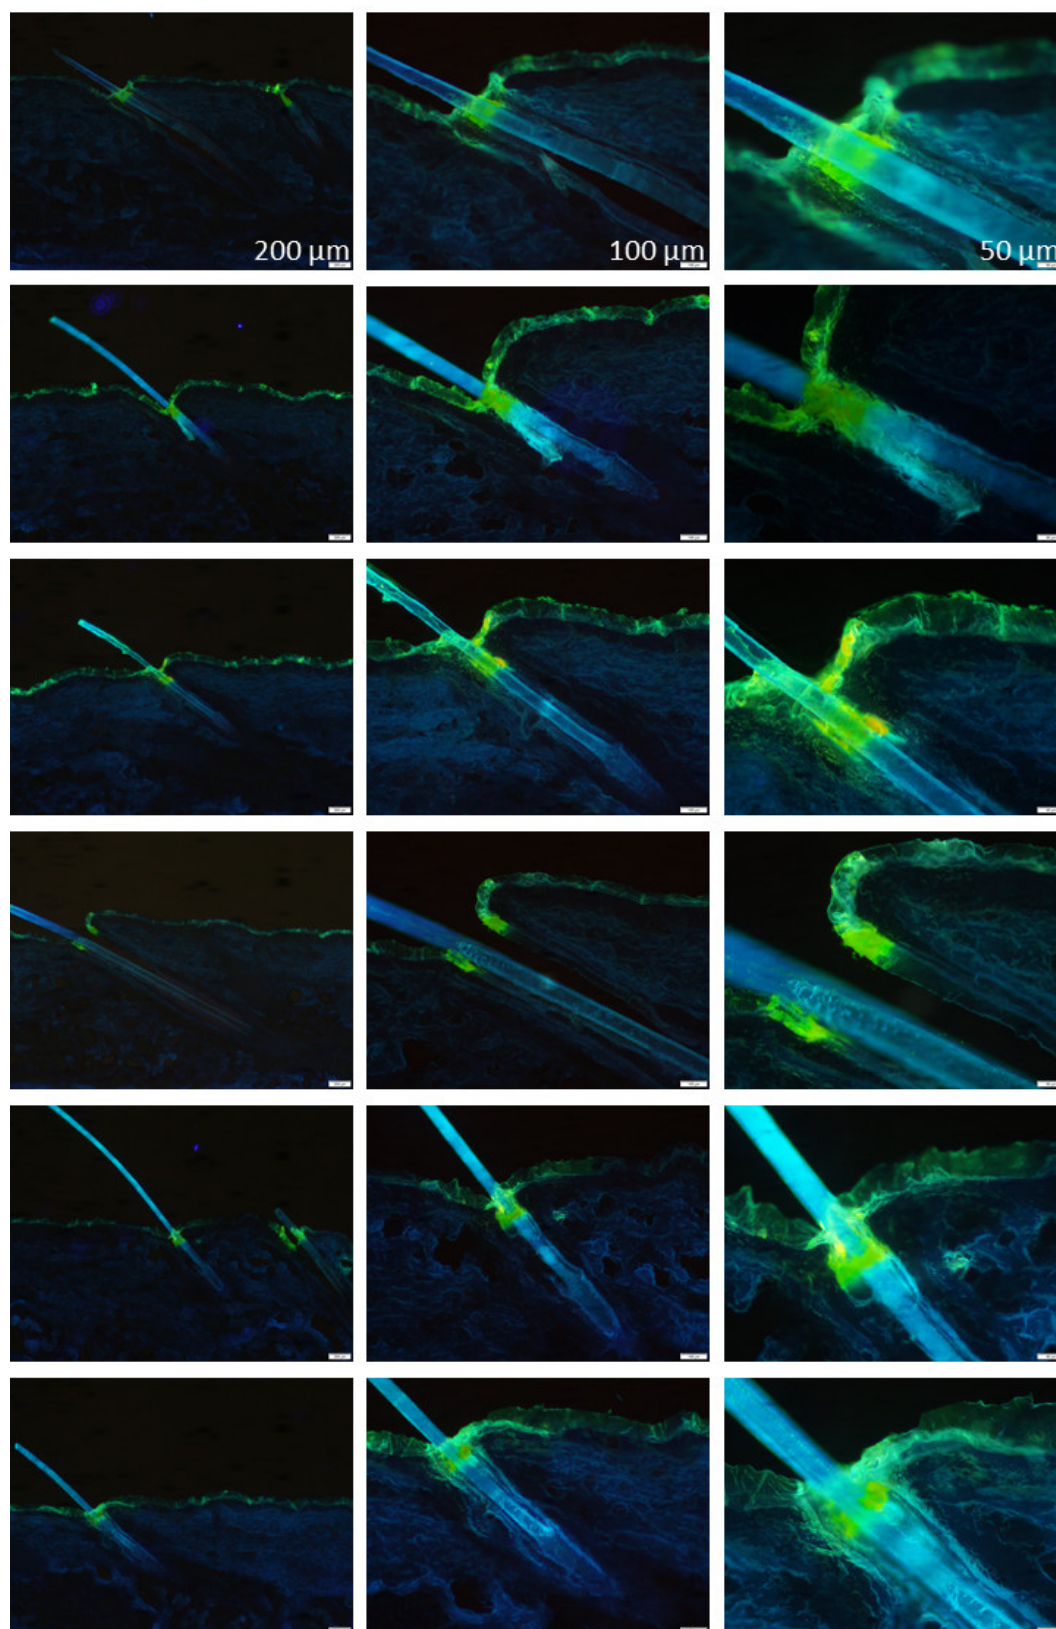

**Figure S12.** Hair follicles treated with nanosuspension with 5% glycerol. Left column: images taken at 40 fold magnification. Middle column: images taken at 100fold magnification. Right column: images taken at 200 fold magnification.

**S13: Hair Follicles Treated with Curcumin Nanocrystals with 5% Urea.**



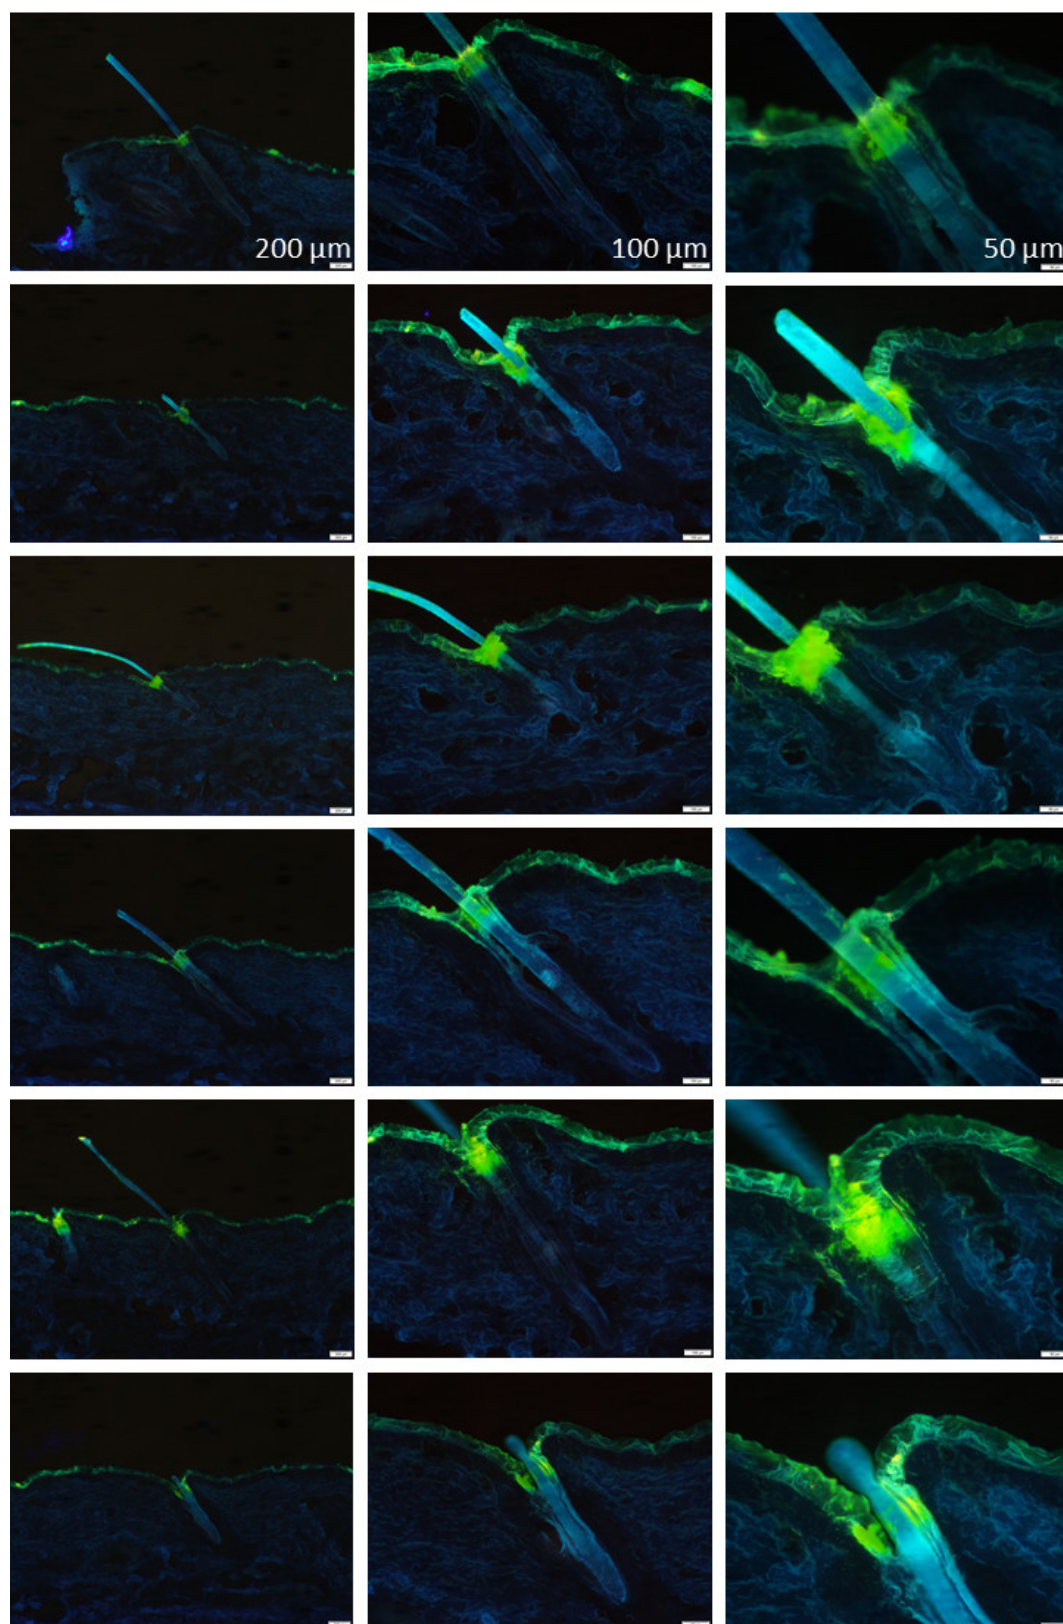

**Figure S13.** Hair follicles treated with nanosuspension with 5% urea. Left column: images taken at 40fold magnification. Middle column: images taken at 100 fold magnification. Right column: images taken at 200 fold magnification.

**S14: Hair Follicles Treated with Curcumin Nanocrystals with 10% Urea.**

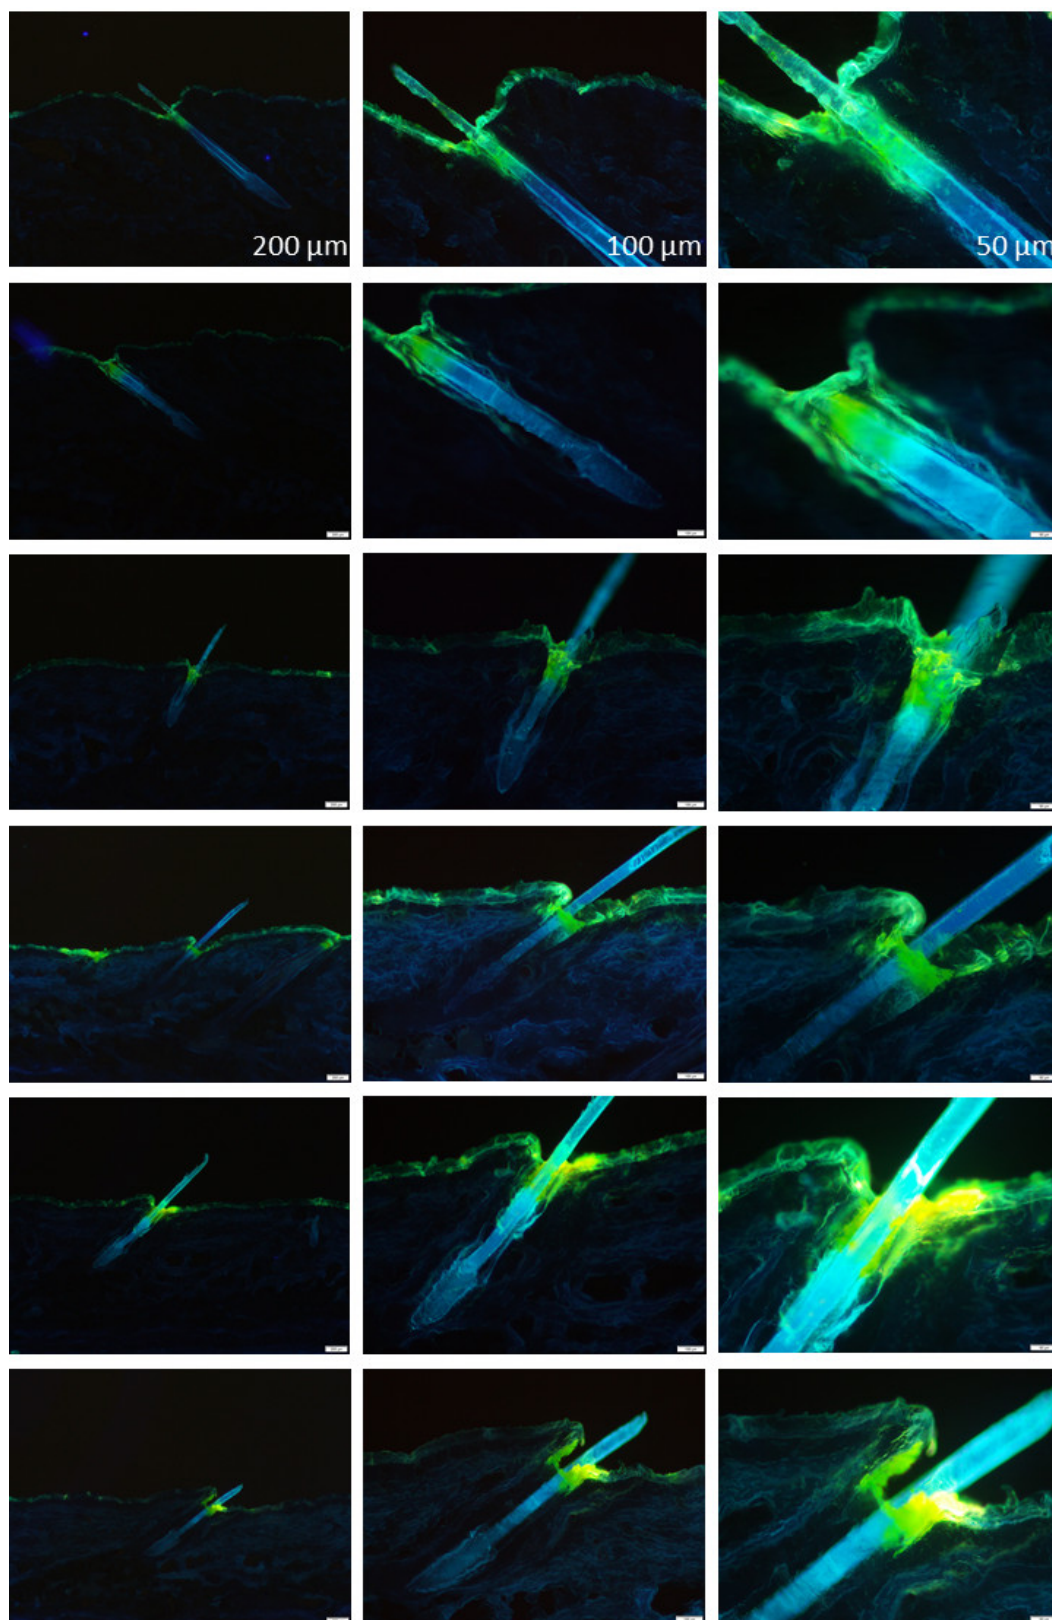

**Figure S14.** Hair follicles treated with nanosuspension with 10% urea. Left column: images taken at 40 fold magnification. Middle column: images taken at 100 fold magnification. Right column: images taken at 200 fold magnification.

**S15: Hair Follicles Treated with Curcumin Nanocrystals without Additives after 14 days Storage.**



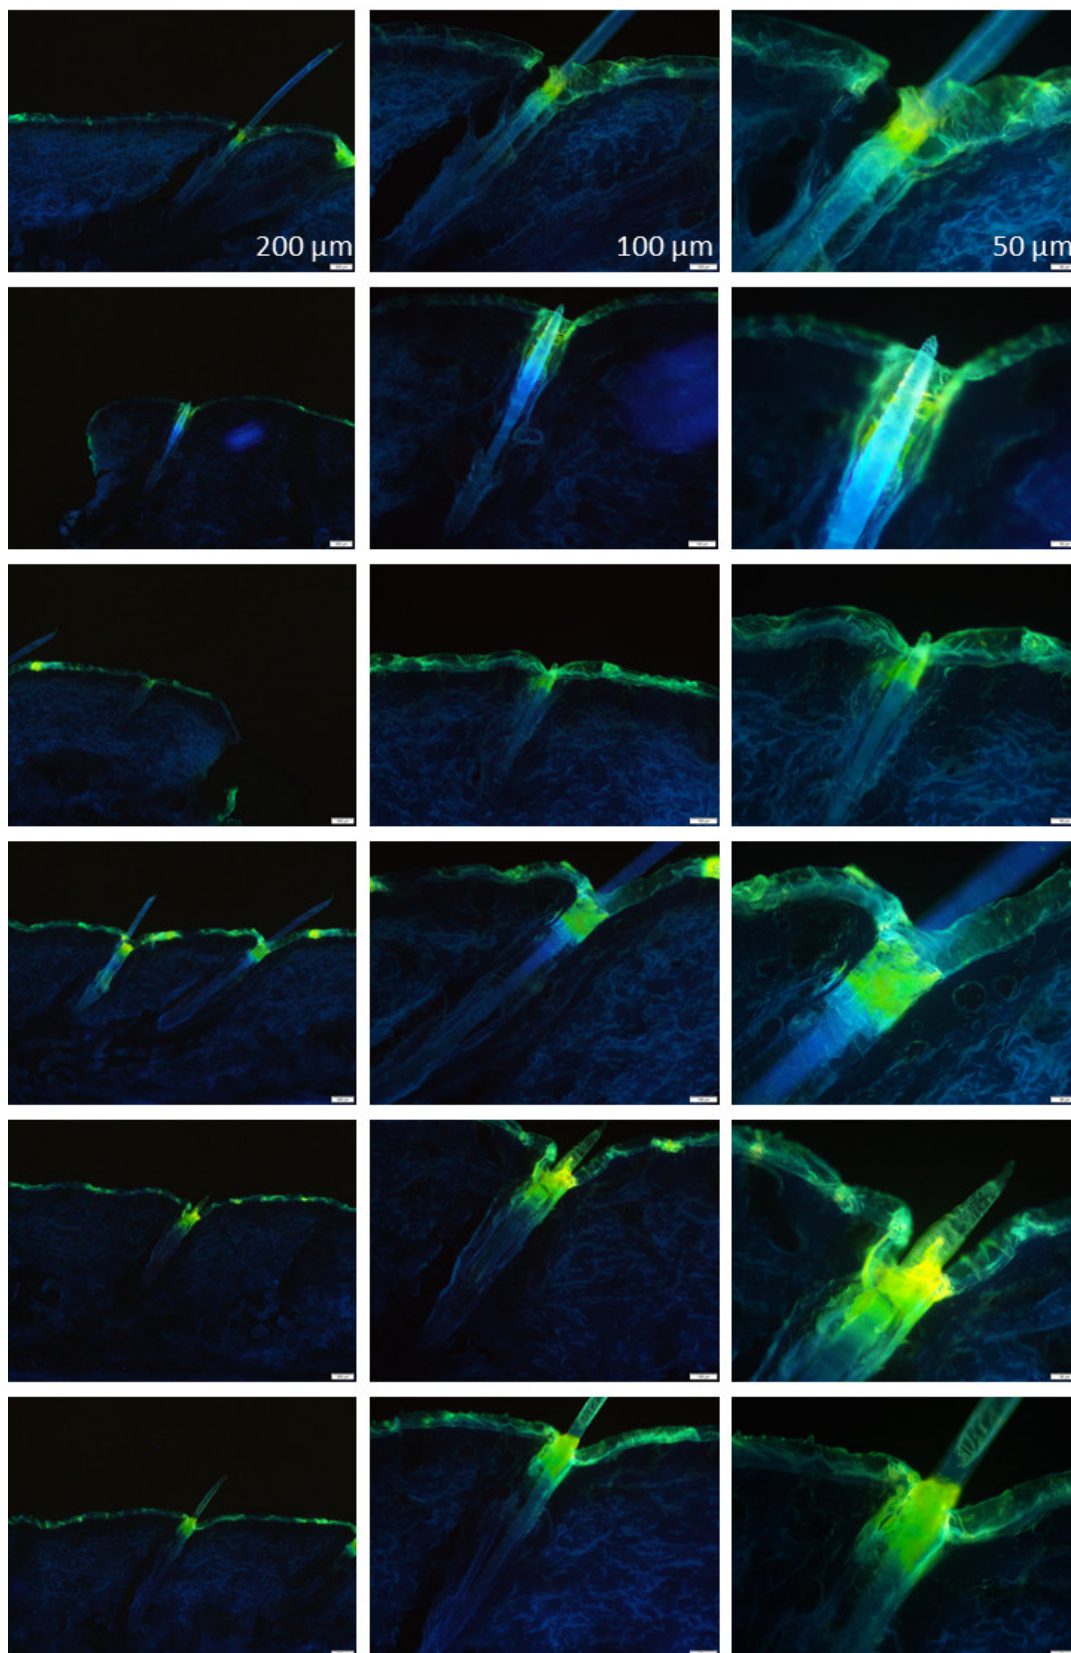

**Figure S15.** Hair follicles treated with nanosuspension without additives after 14 days storage. Left column: images taken at 40fold magnification. Middle column: images taken at 100 fold magnification. Right column: images taken at 200 fold magnification.

**S16: Hair Follicles Treated with Curcumin Nanocrystals with 5% Propylene Glycol.**

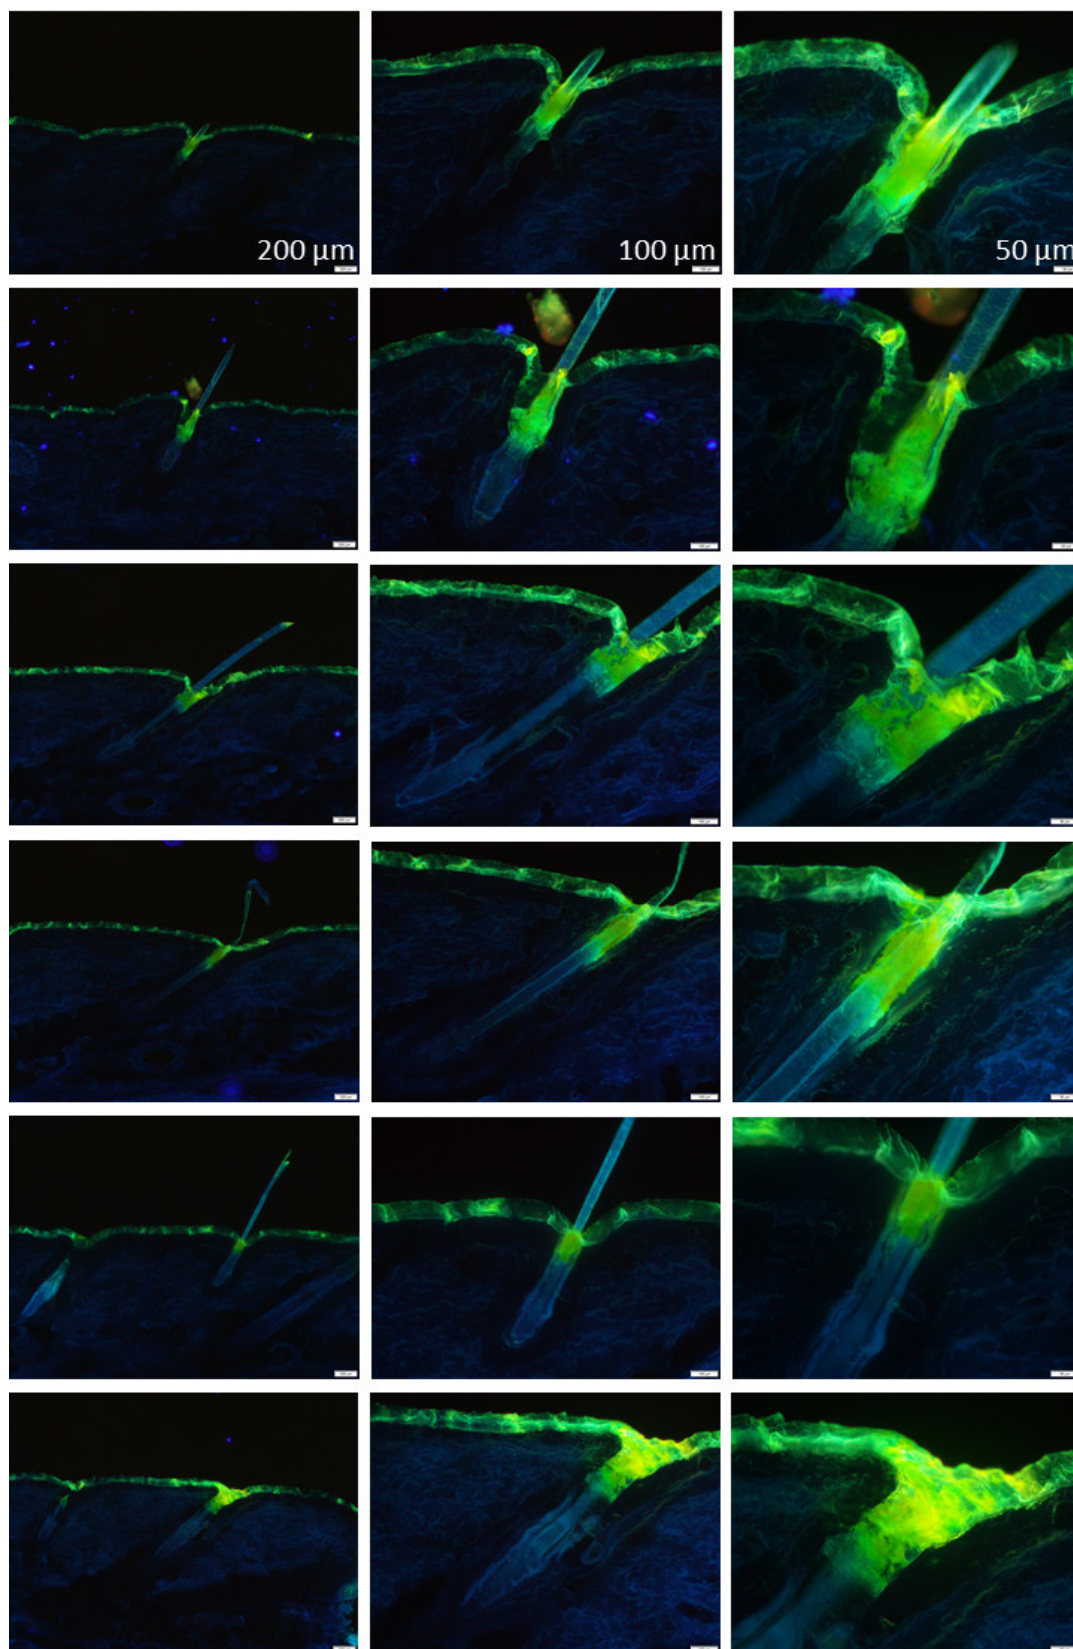

**Figure S16.** Hair follicles treated with nanosuspension with 5% propylene glycol. Left column: images taken at 40 fold magnification. Middle column: images taken at 100 fold magnification. Right column: images taken at 200 fold magnification.

**S17: Hair Follicles Treated with Curcumin Nanocrystals with 2% Ethanol.**



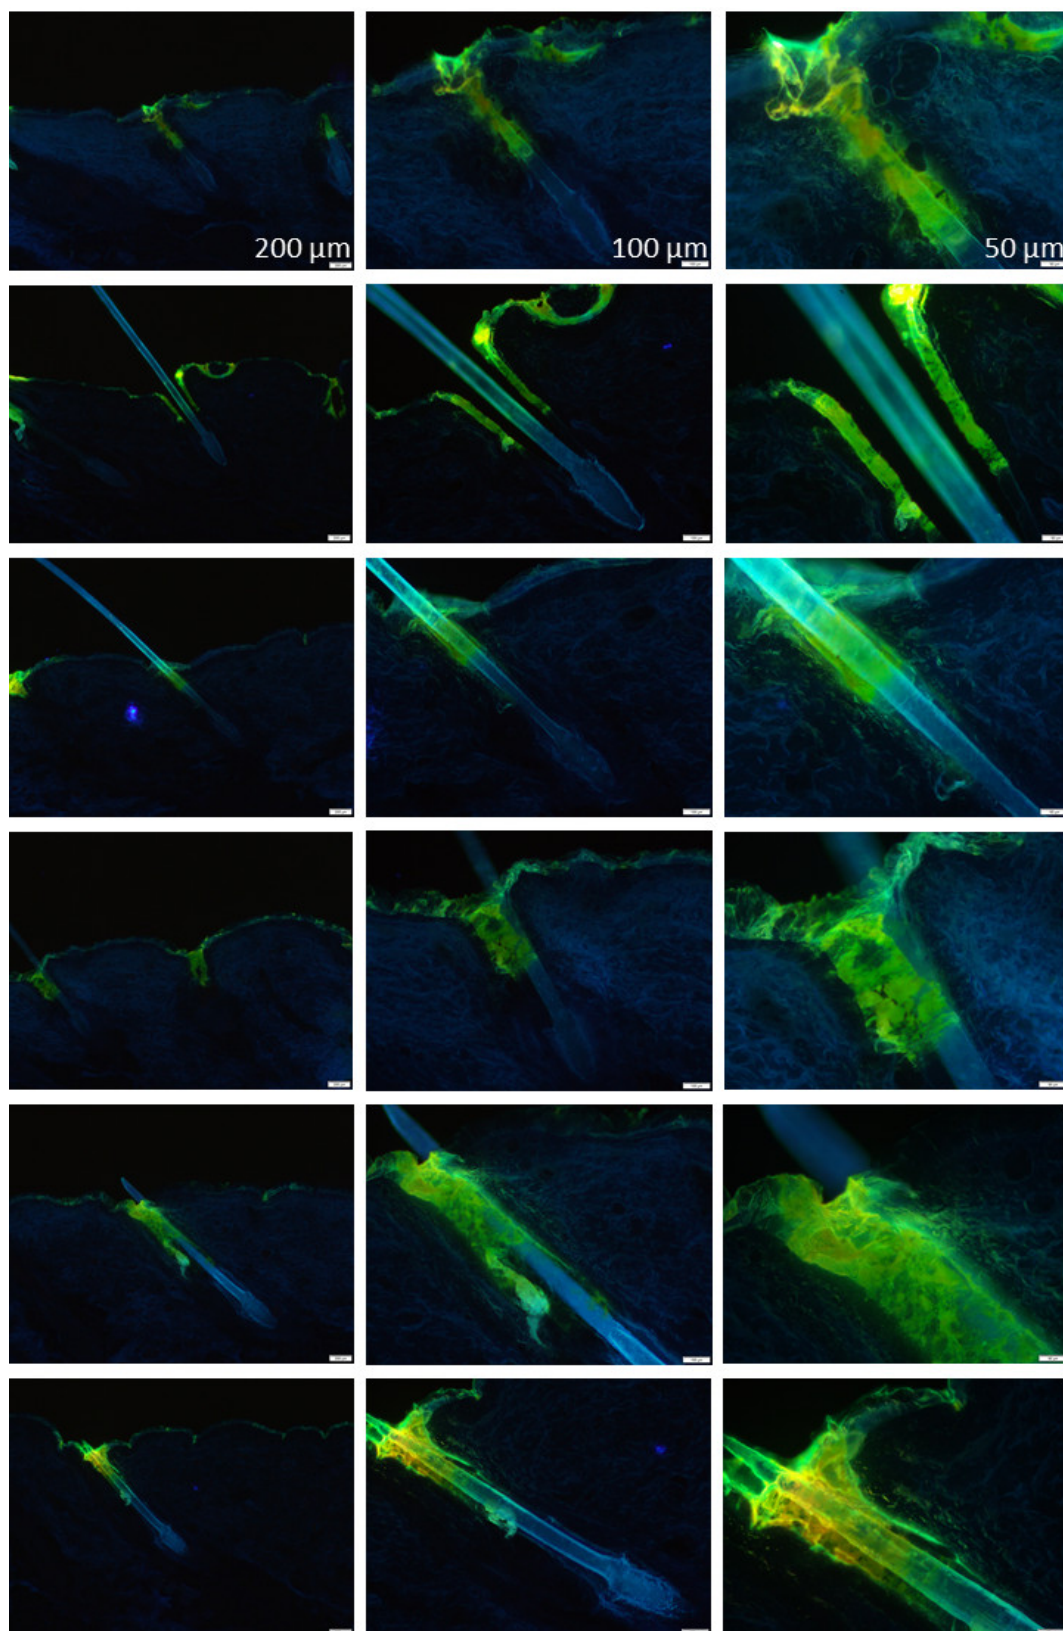

**Figure S17.** Hair follicles treated with nanosuspension with 2% ethanol. Left column: images taken at 40fold magnification. Middle column: images taken at 100 fold magnification. Right column: images taken at 200 fold magnification.

**S18: Hair Follicles Treated with Curcumin Nanocrystals with 2% Olive Oil.**

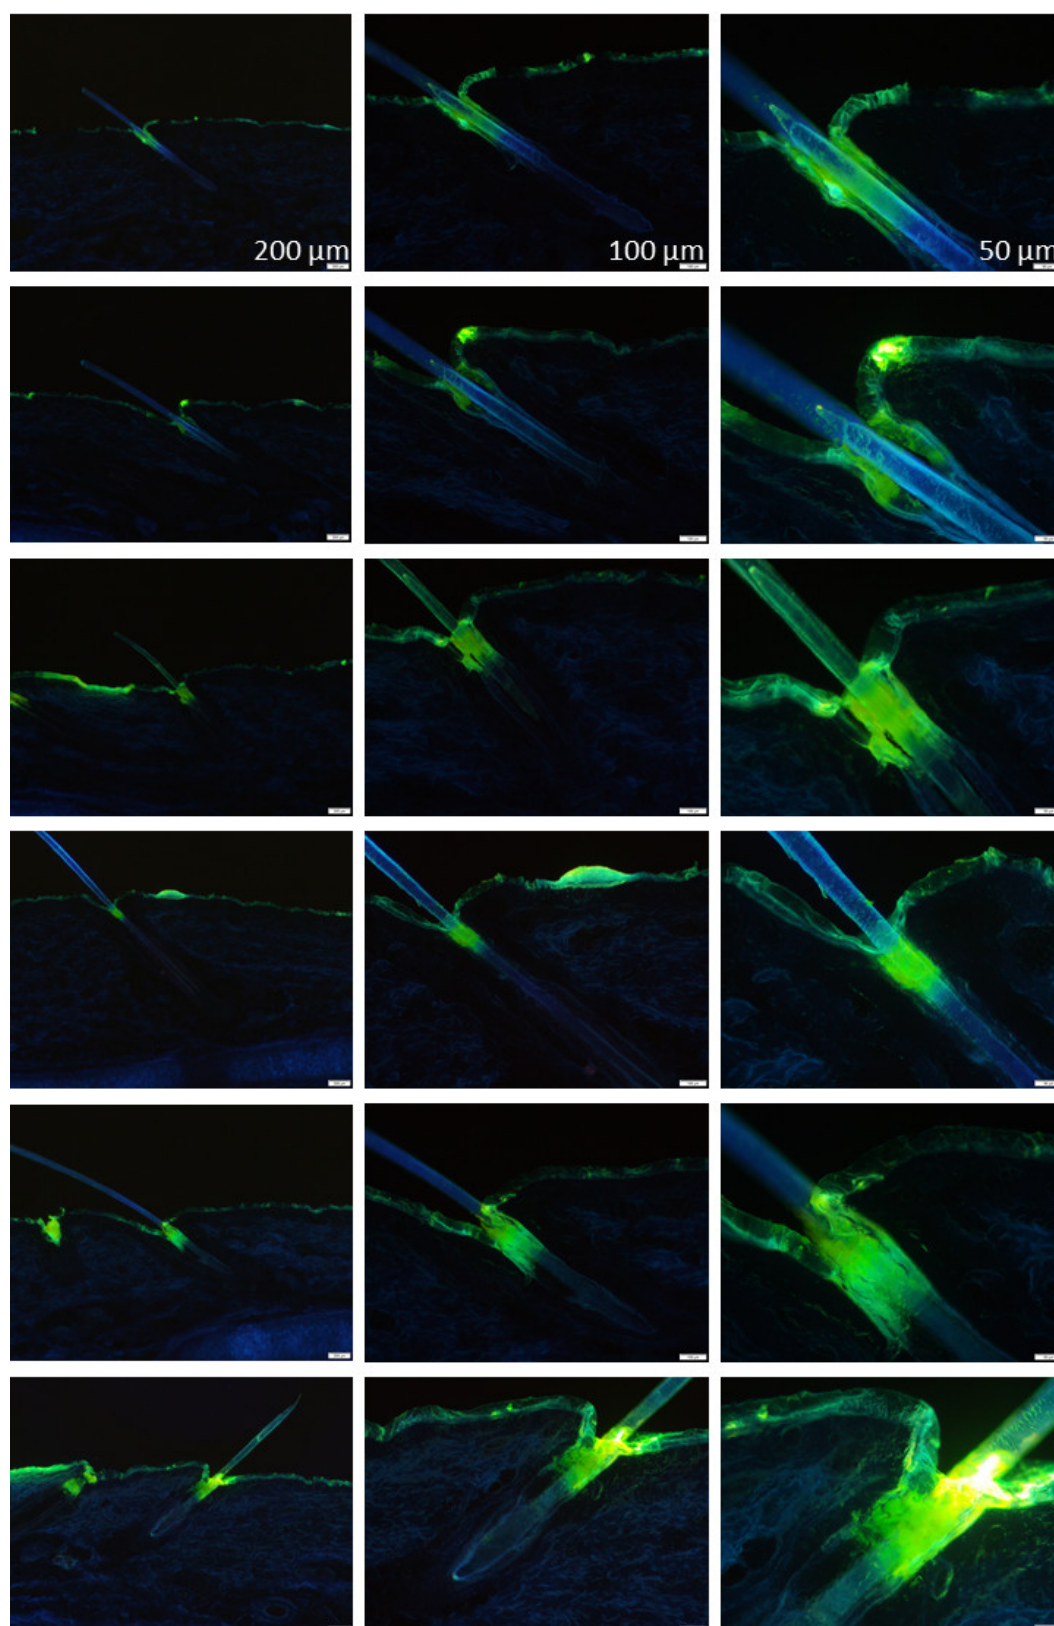

**Figure S18.** Hair follicles treated with nanosuspension with 2% olive oil. Left column: images taken at 40 fold magnification. Middle column: images taken at 100 fold magnification. Right column: images taken at 200 fold magnification.



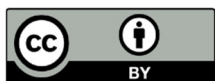

© 2020 by the author. Licensee MDPI, Basel, Switzerland. This article is an open access article distributed under the terms and conditions of the Creative Commons Attribution (CC BY) license (<http://creativecommons.org/licenses/by/4.0/>).
